# Supplementary material
Source: Springer Nature journal article supplement (https://www.springermedizin.de/resource/supplementary/12936_2012_2167_MOESM8_ESM.pdf/9542856)
Supplement: MOESM8 [file 9542856]

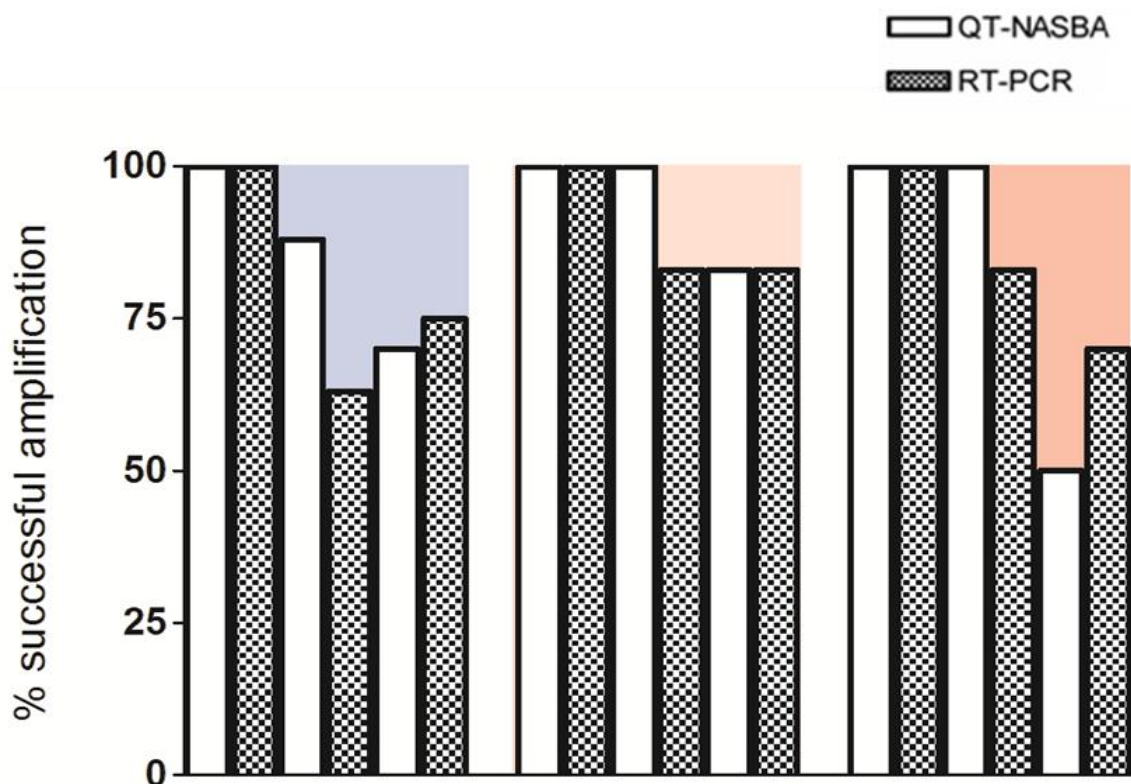

| gametocyte density/ $\mu$ l | 10                    | 1 | 0.1 | 10                   | 1 | 0.1 | 10                    | 1 | 0.1 |
|-----------------------------|-----------------------|---|-----|----------------------|---|-----|-----------------------|---|-----|
| filter paper                | 3MM                   |   |     | 3MM                  |   |     | 3MM                   |   |     |
| week 1 temperature          | $-20^{\circ}\text{C}$ |   |     | $22^{\circ}\text{C}$ |   |     | $35^{\circ}\text{C}$  |   |     |
| subsequent temperature      | $-20^{\circ}\text{C}$ |   |     | $22^{\circ}\text{C}$ |   |     | $-20^{\circ}\text{C}$ |   |     |
| wet/dry                     | dry                   |   |     | dry                  |   |     | wet                   |   |     |
